# Supplementary material for: Implementing a multifaceted tailored intervention to improve nutrition adequacy in critically ill patients: results of a multicenter feasibility study
Source: PubMed Central journal article supplement (PMC4229943; doi:10.1186/cc13867), 2014-05-11
Supplement: cc13867-S2.pdf [file cc13867-S2.pdf]

**Additional File 2: Table Describing Exposure to and Nurses Ratings of the Usefulness of Strategies used to Implement the Action Plans**

|                                               | Exposed      |            | Useful <sup>a</sup> |
|-----------------------------------------------|--------------|------------|---------------------|
|                                               | n/N (%)      | Site range | Median (Site range) |
| <b>Bed-side Tools</b>                         |              |            |                     |
| EN Initiation orders and/or bedside algorithm | 65/80 (81%)  | 59-92%     | 4 (4-5)             |
| Motility agent order                          | 10/13 (77%)  | N/A        | 4 (N/A)             |
| Protocol for withholding feeds                | 5/6 (83%)    | N/A        | 5 (N/A)             |
| Change volume for interruptions               | 33/39 (85%)  | 77-94%     | 4 (4-4)             |
| Daily monitoring checklist                    | 13/13 (100%) | N/A        | 4 (N/A)             |
| <b>Access to Resources</b>                    |              |            |                     |
| Par stock of EN formula                       | 71/81 (88%)  | 83-91%     | 4 (4-5)             |
| RD coverage schedule                          | 29/41 (71%)  | 59-85%     | 4 (3-5)             |
| <b>Education/Information</b>                  |              |            |                     |
| Nutrition section in ICU protocol             | 16/21 (76%)  | N/A        | 4 (N/A)             |
| Bedside huddles                               | 53/72 (74%)  | 46-94%     | 4 (4-4)             |
| Informal education by RD on rounds            | 35/38 (92%)  | 86-100%    | 4 (4-4)             |
| Lunch and learns                              | 4/6 (67%)    | N/A        | 4 (N/A)             |
| Nutrition Information Sheets (NIBBLE)         | 41/79 (52%)  | 0-82%      | 4.5 (3.5-4)         |
| Newsletter                                    | 6/12 (50%)   | N/A        | 2.5 (N/A)           |
| Intranet posting                              | 10/21 (48%)  | N/A        | 3.5 (N/A)           |
| Grand Rounds presentation                     | 11/27 (41%)  | 33-67%     | 4 (4-4.5)           |
| <b>Reminder</b>                               |              |            |                     |
| Posters                                       | 63/77 (82%)  | 67-94%     | 4 (3-4.5)           |

<sup>a</sup> Rating scale: 1=useless, 2=somewhat useless, 3=neutral, 4=somewhat useful, 5=very useful

N/A – strategy employed at single site only
